# Supplementary material for: Engineered Saccharomyces cerevisiae for the De Novo Biosynthesis of (−)-Menthol
Source: MDPI journal article supplement (doi:10.3390/jof8090982), 2022-09-19
Supplement: s1 [file s1]

## Supplementary Materials

**Table S1. Different media composition and content**

|                        | Composition                                     | Content  |
|------------------------|-------------------------------------------------|----------|
| Fermentation medium I  | Soybean peptone                                 | 50 g/L   |
|                        | Glucose                                         | 25 g/L   |
|                        | Sucrose                                         | 25 g/L   |
|                        | K <sub>2</sub> HPO <sub>4</sub>                 | 0.6 g/L  |
|                        | Glycerol                                        | 25 mL/L  |
| Fermentation medium II | Sucrose                                         | 75 g/L   |
|                        | Peptone                                         | 10 g/L   |
|                        | Sodium glutamate                                | 2 g/L    |
|                        | (NH <sub>4</sub> ) <sub>2</sub> SO <sub>4</sub> | 15 g/L   |
|                        | KH <sub>2</sub> PO <sub>4</sub>                 | 8 g/L    |
|                        | ZnSO <sub>4</sub> ·7H <sub>2</sub> O            | 0.72 g/L |
|                        | MgSO <sub>4</sub> ·7H <sub>2</sub> O            | 6 g/L    |
|                        | Succinic acid                                   | 11 g/L   |
|                        | Uracil                                          | 20 mg/L  |
|                        | Methionine                                      | 0.15 g/L |
|                        | Vitamin solution                                | 12 mL/L  |
|                        | Trace metal solution                            | 10 mL/L  |
|                        | Liquid paraffin                                 | 10 mL/L  |
|                        | Glycerol                                        | 5 mL/L   |

**Note:**

**Vitamin solution** contained 62.5 mL/L biotin solution (1mg/ml), 1.25 g/L calcium pantothenate, 1.25 g/L nicotinic acid, 31.25 g/L myo-inositol, 1.25 g/L thiamine, 1.25 g/L pyridoxal, and 0.25 g/L p-aminobenzoic acid.

**Trace metal solution** contained 10.2 g/L ZnSO<sub>4</sub>·7H<sub>2</sub>O, 0.5 g/L MnCl<sub>2</sub>·4H<sub>2</sub>O, 0.75 g/L CuSO<sub>4</sub>·5H<sub>2</sub>O, 0.47 g/L CoCl<sub>2</sub>·6H<sub>2</sub>O, 0.56 g/L Na<sub>2</sub>MoO<sub>4</sub>·2H<sub>2</sub>O, 3.84 g/L CaCl<sub>2</sub>·2H<sub>2</sub>O, 5.12 g/L FeSO<sub>4</sub>·7H<sub>2</sub>O, 15 g/L EDTA.

**Biotin solution**, 1g biotin was dissolved into 1L of ethanol and 4N-sulfuric acid mixtures (1:1)

**Table S2. Plasmids used in this study**

| Plasmids                        | Description                                                                          | Source     |
|---------------------------------|--------------------------------------------------------------------------------------|------------|
| PY13                            | Amp, HIS3, CEN/ARS, <i>E. coli</i> - <i>S. cerevisiae</i> shuttle vector             | Lab work   |
| PY14                            | Amp, TRP1, CEN/ARS, <i>E. coli</i> - <i>S. cerevisiae</i> shuttle vector             | Lab work   |
| PY15                            | Amp, LEU2, CEN/ARS, <i>E. coli</i> - <i>S. cerevisiae</i> shuttle vector             | Lab work   |
| PY15-erg20 <sup>ww</sup> -tLims | PY15 derivate, $\Delta P_{TEF1}::$ Erg20 <sup>ww</sup> -P <sub>GALI, 10</sub> -tLims | This study |
| PY14-L3H-CPR1                   | PY14 derivate, $\Delta P_{TEF1}::$ CPR1- P <sub>GALI, 10</sub> -L3H                  | This study |
| PY13-IPDH-IPR                   | PY13 derivate, $\Delta P_{TEF1}::$ IPDH- P <sub>GALI, 10</sub> -IPR                  | This study |
| PY13-KSI-PGR                    | PY13 derivate, $\Delta P_{TEF1}::$ KSI- P <sub>GALI, 10</sub> -PGR                   | This study |
| PY13-MMR                        | PY13 derivate, $\Delta P_{TEF1}::$ P <sub>GALI</sub> -MMR                            | This study |
| PY26-L3H                        | PY26 derivate, $\Delta P_{TEF1}::$ P <sub>GALI0</sub> -L3H                           | This study |
| PY26-L3H-CPR1                   | PY26 derivate, $\Delta P_{TEF1}::$ CPR1- P <sub>GALI, 10</sub> -L3H                  | This study |
| PY26-IPDH                       | PY26 derivate, $\Delta P_{TEF1}::$ P <sub>GALI</sub> -IPDH                           | This study |
| PY26-IPR                        | PY26 derivate, $\Delta P_{TEF1}::$ P <sub>GALI0</sub> -IPR                           | This study |
| PY26-KSI                        | PY26 derivate, $\Delta P_{TEF1}::$ P <sub>GALI</sub> -KSI                            | This study |
| PY26-PGR                        | PY26 derivate, $\Delta P_{TEF1}::$ P <sub>GALI0</sub> -PGR                           | This study |
| PY26-MMR                        | PY26 derivate, $\Delta P_{TEF1}::$ P <sub>GAL3</sub> -MMR                            | This study |
